# Supplementary material for: Competition between histone and transcription factor binding regulates the onset of transcription in zebrafish embryos
Source: eLife. 2017 Apr 20;6:e23326. doi: 10.7554/eLife.23326 (PMC5451213; doi:10.7554/eLife.23326)
Supplement: Figure 1—source data 1. — At every stage, cells were counted for three biological replicates, each consisting of three embryos. DOI: http://dx.doi.org/10.7554/eLife.23326.004 [file elife-23326-fig1-data1.xlsx]

## Sheet: Sheet1
Figure 1—source data 1
Cell numbers for wild-type zebrafish embryos
	Biological replicate number
	1	2	3
1K	984	1054	1015
	1008	1011	1019
	1042	1039	1026
high	1738	1988	2063
	1665	1799	1961
	1879	1939	2061
oblong	3101	3090	3461
	3384	2654	3352
	3228	3311	3360
sphere	3721	3779	4137
	4171	3647	3773
	3847	3718	4166
dome	6536	6971	6861
	7116	6963	6603
	6790	6766	7272
