# Supplementary material for: Competition between histone and transcription factor binding regulates the onset of transcription in zebrafish embryos
Source: eLife. 2017 Apr 20;6:e23326. doi: 10.7554/eLife.23326 (PMC5451213; doi:10.7554/eLife.23326)
Supplement: Figure 2—source data 1. — DOI: http://dx.doi.org/10.7554/eLife.23326.007 [file elife-23326-fig2-data1.xlsx]

## Sheet: Sheet1
Figure 2—source data 1
NanoSting probe set
An RNA-seq data set was used to select control genes based on stable expression between 2-4-cell and shield stage, and zygotic genes based on minimal maternal contribution and strong induction during genome activation (Pauli et al., 2012). A developmental time series from 512-cell to dome using NanoString confirmed that all control genes were stable and zygotic genes were induced at appropriate s…
Gene name	Accession	Position	Target Sequence	HUGO Gene	NSID	Gene category
bcap29	ENSDART00000007638.2	717-816	GCTCTGAAAAAGTCAAAGTCTGATTTAGACACCATGAAGAAACAAAGTGACGGACTGACCAAAGAGTACGAGCGGCTGCTTCAGGAGCACCAGCAGCTGC	ENSDARG00000016231	ENSDART00000007638.2:716	Control
ehd3	ENSDART00000022694.2	1092-1191	GGCACACGATCTAAACAAGTTCCAGCCTCTAAAAATGAAGCTTTTGGACACTGTGGATGATATGCTGGCCCATGACATCGCCCAACTTATGGTTCTGGTG	ENSDARG00000007869	ENSDART00000022694.2:1091	Control
eif4g2a	ENSDART00000027616.2	1493-1592	GGGCAGAACCTGCTTTTCCAAAACCAGACTCATTCATCTCAACAGCAAGCTCAGTCTAAGGATATGCCACCACGTTTCACTAAGAAAGGACAGCTGAATG	ENSDARG00000020377	ENSDART00000027616.2:1492	Control
paf1	ENSDART00000064444.2	156-255	GAAGGTGGAAGTCAAGATCGGTGTGTCCGTCAAGCAGCAGTTCACAGAGGAGGAGATCTATAAAGACAGAGACAGTCAGATCGCTGCCATTGAGAAGACC	ENSDARG00000043886	ENSDART00000064444.2:155	Control
phykpl	ENSDART00000059369.2	790-889	GTAGCAGAATATGTTCATGAAGCAGGAGGGGTTTATGTGGCAGATGAGATTCAGACAGGCTTTGGTCGTGTTGGGAGTCATTTCTGGGCGTTTCAGCTTG	ENSDARG00000040566	ENSDART00000059369.2:789	Control
prcc	ENSDART00000092265.2	537-636	CACAGAGCCCGTGAAAATCATCGTTCCTCAAATAAAACCCGCAGATTCGGACTCTGATGATGATGAGCCAGTGCGAAAGAAATCAGCTCCTCGGGGCAGT	ENSDARG00000063252	ENSDART00000092265.2:536	Control
qrich1	ENSDART00000040171.2	1413-1512	AATGAACAAAATAAGCTGGCACCTATTGGACGTCGACAGCCGCTGCGCTTCCAGGACGATCTTGTGTCGAGTTCAGTGGGAGAGTTGAACCTGGCTCTGT	ENSDARG00000019797	ENSDART00000040171.2:1412	Control
RNA binding motif protein 26	ENSDART00000066084.2	1655-1754	GATTCCTCCAAAGAAACCCTGGTTTGACAAACCGAACTTCAGCAAACCCAATCACCACGGCTTTCACAGAAAAGTGCCCTTCCCTTTAGCAAACACCAAA	ENSDARG00000018889	ENSDART00000066084.2:1654	Control
rnmt	ENSDART00000088917.2	691-790	AGAGCGAGTCGCAGGCTGACACCATGCTGAGAAATGCCTGTGAGAGACTCCGGCCTGGAGGATTCTTCATCGGGACAACTCCTGATGCATATGAGCTGGT	ENSDARG00000070553	ENSDART00000088917.2:690	Control
sec31a	ENSDART00000108587.2	1096-1195	GTGTTTCGATATCCAGTGGTGCCCAAGAAACCCAGCTGTTCTGTCTGCTGCTGCTTTTGATGGCCACATCAGTATCTACTCCATTATGGGAGGAAGCAAT	ENSDARG00000021082	ENSDART00000108587.2:1095	Control
ube2q	ENSDART00000016117.2	297-396	TCACTGCAACATCACGGAGTCTTATCCTTCAACACCACCAATATGGTTTGTTGATTCTGATGATCCAAGTCTGACTGAAGTCCTTGAGCGACTGGAGGAT	ENSDARG00000013990	ENSDART00000016117.2:296	Control
yap1	ENSDART00000098914.2	1296-1395	CACCCAAAACCCTGTGTCTTCACCTGGTATGGGCCAAGACGCCCGTAACATGACCACCAACAGCTCTGACCCTTTCTTGAACAGCGGGACATATCACTCT	ENSDARG00000068401	ENSDART00000098914.2:1295	Control
admp	ENSDART00000037557.2	969-1068	GCAAAAAAAACGTCTCGCAAGGGAAGAAGCTGCTCTCATCCAGACTGGTTCCAATTCACTCTACTGGCTGGGAGGTTTTTACCATCACTCAAGCTGTGCG	ENSDARG00000025372	ENSDART00000037557.2:968	ZGA gene
akap12b	ENSDART00000110883.2	356-455	GAGAAGGGAGACGATTCTGCAAATGCAGATGAGATTACAACTGCTGAAGAGAAGGTGGTAGAGGAAAAACAAGAAGAGGCCAATGAAGTGGGCTTCAAGA	ENSDARG00000055678	ENSDART00000110883.2:355	ZGA gene
aldob2	ENSDART00000139865.2	191-290	ATGAATCCACAGGCACCATGGCGAAGCGTTTCCAGAAGATAAATGTAGAGAACACTGAAGAAAATCGCCGTAGCTTTCGCGACCTTCTCTTCTCAGTAGA	ENSDARG00000053684	ENSDART00000139865.2:190	ZGA gene
aplnrb	ENSDART00000129643.2	1215-1314	CACAAGGACTCAAAGGTAATTCAGGTGTCAGGGATGAGCAGACTTTCCTTTTGTATCTGACTGTGGGAACTTGAGAATCTGTCCCGGAACTACAAGTTGG	ENSDARG00000036670	ENSDART00000129643.2:1214	ZGA gene
apoeb	ENSDART00000058965.2	566-665	TACCTGCAAGAGCTGAAGACCATGATGGAGCAGAATGCAGATGACGTGAAGAACCGTGTCGGCACCTACACACGCAAACTGAAGAAACGCCTGAACAAGG	ENSDARG00000040295	ENSDART00000058965.2:565	ZGA gene
asb11	ENSDART00000079068.2	415-514	CCCGCCCTTGTCAGCCTCATTTTGACACACAGCTCCGCCCACCATCCAGCTCACCTGCTCTGCTCACCTCTGCATGAAGCTGCAAAGAGAGGTCACACGG	ENSDARG00000056561	ENSDART00000079068.2:414	ZGA gene
atf4a	ENSDART00000042970.2	496-595	ATCTGGATCTGGACTCTCTCCCGTTCGGTTCCGCAGACCTGGATCTCCCTCTGGGCCTGGACCTCCCGCTTCCTGAAGAGATCAAATCGGAGCCTCTCTC	ENSDARG00000039515	ENSDART00000042970.2:495	ZGA gene
atf4b	ENSDART00000055609.2	579-678	GGATTGGATGACAGAACGAATTGATCTGAGTGAGTTTGATCTGGAGTCTTTGATAGACTCTTATGATTCTGAGGATCCACCCAGTTCTCCTGAGGAGCTC	ENSDARG00000038141	ENSDART00000055609.2:578	ZGA gene
blf	ENSDART00000063318.2	1213-1312	CTTTACTTGGGAATCATGCCTGAAGAACCACCTGAAAACTCATTCAGAGGAGAAGCCTCATAAGTGCTCCGTCTGCGGTAAAGGTTTCCGTCTGGCAAAT	ENSDARG00000043126	ENSDART00000063318.2:1212	ZGA gene
bmp2b	ENSDART00000131169.2	1088-1187	CCGAGGAGGCTGAGAGCAACCGGAGGAAGCACGTGAGGGTCAGTCGTTCCCTTCACGCGGATGAGGACTCGTGGGCACAAGCCCGACCTCTGCTGGTAAC	ENSDARG00000041430	ENSDART00000131169.2:1087	ZGA gene
bmp7a	ENSDART00000016472.2	1143-1242	GACACTGGTTCATTTCATAAACCCTGAAACTGTCCCGAAGCCCTGCTGCGCTCCAACTCAGCTGCACGGAATCTCAGTTTTGTACTTCGATGACAGCTCC	ENSDARG00000018260	ENSDART00000016472.2:1142	ZGA gene
C22H19orf44	ENSDART00000122324.2	830-929	TGAATGATCTTTTTCCTGCTGCTCCAGCACATGATTCTGAAGACACTCTGAGCGAGATGAGTGCAGCATCTGATGATTTCAAACTGAACGTAATGACACT	ENSDARG00000090673	ENSDART00000122324.2:829	ZGA gene
ccne2	ENSDART00000038155.2	550-649	AGACATTGGCAAAGATCAACTGCAGCTCATCGGCATAACCTCACTCTTCATAGCCTCAAAGATAGAGGAGATTTATCCACCAAAGCTCCAAGAGTTTGCT	ENSDARG00000027918	ENSDART00000038155.2:549	ZGA gene
cebpb	ENSDART00000062702.2	565-664	GACGCGCATAGACGCCGTGTTCAGCCCGGACTTTATGGGCAGTTTTGCCAAAAGTAACGGGCGACACGAAGAGACGCCAATGGATGGTCCCGGTGGCTAT	ENSDARG00000042725	ENSDART00000062702.2:564	ZGA gene
cldne	ENSDART00000063320.2	389-488	AGGCTAAAGTGTCCATCGCCAGCGGCGTGATCTTCATCATTGCTGGAGTTCTGGTGCTGGTGCCTGTTTGCTGGTCCGCCAACACCATCATCAGAGATTT	ENSDARG00000043128	ENSDART00000063320.2:388	ZGA gene
cst3	ENSDART00000065435.2	203-302	CAAAGATTCTCAGAGTGCGCTACAGTTCGCAATGGCCCAGTACAACAGACAAAGCAATGATGCGTATGTGAGAGGTGTTTCCAAAGTCACCAAGCTCCAA	ENSDARG00000007795	ENSDART00000065435.2:202	ZGA gene
cxcr4a	ENSDART00000080350.2	387-486	GAGGGTTCATGTGCGTGGCCGTGCATATGATTTACACGGTAAACTTGTACAGCAGCGTCCTCATCCTCGCCTTCATCAGTTTGGACCGGTACCTCGCTGT	ENSDARG00000057633	ENSDART00000080350.2:386	ZGA gene
cxcr4b	ENSDART00000061499.2	1017-1116	GTCAGGTTCAGTAAATCTGCCCGTAACGCTCTGAGCATCAGCAGTAGATCCAGTCACAAGATGCTGACCAAGAAAAGGGGGCCTATATCATCTGTATCTA	ENSDARG00000041959	ENSDART00000061499.2:1016	ZGA gene
depdc7	ENSDART00000077341.2	581-680	CAAAACGGATAAATCTCTGGAGGACGTTTTAGGAAATCTGAACATGAACACAACCATCACTCCGCAGATGATGAATCTGGGATTATCACAAGAGTTGATG	ENSDARG00000055043	ENSDART00000077341.2:580	ZGA gene
dusp6	ENSDART00000104496.2	1268-1367	TATTGATGAGGCCCGTGGACTGAAGTGTGGCGTGCTTGTTCACTGCCTTGCAGGCATCAGTCGTTCTGTCACTGTAACAGTGGCGTACCTCATGCAGAAG	ENSDARG00000070914	ENSDART00000104496.2:1267	ZGA gene
etv4	ENSDART00000136212.2	410-509	CAGTTACCCCATGAACCCCAGTTCCAGGTTCCCTTCCGGCTCGGCAGAGATGTGCCCACCATTCGCTTCCCAAGGCCAGGCCCTGCAGCGCATGCATCCT	ENSDARG00000018303	ENSDART00000136212.2:409	ZGA gene
fam212aa	ENSDART00000124800.2	513-612	TAAAAACATTCGTGTATCCTCCACTGCATGTCTCCGCACTAACCAGCTCTCCAACACCCGAGCACGTCCTAAATCCACCTCCGATGCTTGCTTGGAAAGT	ENSDARG00000070360	ENSDART00000124800.2:512	ZGA gene
fam46ba	ENSDART00000058424.2	1368-1467	CTACATTGCTCACGTGCAGCCGCTGGTTCACACTTGCAGTAGTTCCTATCCGACATGGCTGCCCTGTAACTGACACAGTCGACATCCGTTCTCGTACATC	ENSDARG00000039943	ENSDART00000058424.2:1367	ZGA gene
fgfr4	ENSDART00000100286.2	2383-2482	TGCTGGCTGGAGTTATGGAGTTTGAACTGCCTTATGATCCTGATTGGGAGTTTCCAAGAGAGAATTTGACTTTAGGGAAACCGCTTGGAGAGGGTTGCTT	ENSDARG00000069105	ENSDART00000100286.2:2382	ZGA gene
flh	ENSDART00000011520.2	299-398	TTCGCGTACAGCCAAAGCATCATGCAAACTCAGACAGGCTATCCCGTGTTCTGCTATCCGCCCTACAACTTCCAAACAACATGTCGTGGAGCTGTGTACG	ENSDARG00000021201	ENSDART00000011520.2:298	ZGA gene
foxa3	ENSDART00000010813.2	1616-1715	GACCCTCTACAGCAGGTCTGTCCTCAATGCATCCTAATGTGTTTACCAGCCAGTTGAACTCTACAGACTGTTAATGGCAGGACATCTTCAACACGGAGCT	ENSDARG00000012788	ENSDART00000010813.2:1615	ZGA gene
foxd5	ENSDART00000062303.2	702-801	CTATGAACATTAAAATCCACGACGCTCCAGAAATCCAGCAAAGGCCCGAACACAAAACCCAGAGGTGCTCATTCAGCATTGACAGCATTATGGCCAAATC	ENSDARG00000042485	ENSDART00000062303.2:701	ZGA gene
ftr82	ENSDART00000016758.2	1191-1290	ATCAGTAAATGAAGTACCAGTTTACACTGTGGAGAATCGCACCAAGGAGAAGACTGCCAGAGCTAAAGAAATTCATACAGTGGACAGTTCGCCTCCTGTA	ENSDARG00000055647	ENSDART00000016758.2:1190	ZGA gene
fzd7a	ENSDART00000084055.2	970-1069	ATTACATTACAGCCAAACCTGGTGGTCAGACCCAACCAGCAATTCACATGCCCGCTGCAACTCAAAGTGCCCACTTATCTGAAGTACCACTTTATGGGCG	ENSDARG00000060004	ENSDART00000084055.2:969	ZGA gene
gadd45ba	ENSDART00000036939.2	589-688	GTTGCAAAAACCAATGGATTCCTTATCTGTCCCTGCAAGAACGCTGAACTATTCGCGATGCTGTTTCTGCAACGAAAGGATGAAAGAGTCATTCTCTGCG	ENSDARG00000027744	ENSDART00000036939.2:588	ZGA gene
gadd45bb	ENSDART00000005382.2	547-646	ATGAGGAGGACGAGAATGATGTTGCGCTTCAGATCCACTTCACGCTCATCCAAGCCTTCTGCTGCGACATCGACATCAACATTGTGCGCGTGTCCGGCAT	ENSDARG00000013576	ENSDART00000005382.2:546	ZGA gene
gata3	ENSDART00000025153.2	914-1013	TTCAGAGGGTAGAGAATGTGTAAACTGCGGGGCCACCTCGACTCCTCTGTGGCGGAGGGATGGCACCGGTCACTATTTGTGTAACGCCTGCGGACTTTAC	ENSDARG00000016526	ENSDART00000025153.2:913	ZGA gene
grhl3	ENSDART00000114215.2	1521-1620	AATCTGAGGAAGTATTTGATGCCCTCATGCTGAACACGCCAAACCTCAAGGGCCTTAAAGAAGCGATTTCAGAAAAGTATGGCATGCAAGAAGACACCAT	ENSDARG00000078552	ENSDART00000114215.2:1520	ZGA gene
gsc	ENSDART00000082085.2	471-570	TACAGGTTATGACAGCGCCGGCTCTGTGCTTATTTCTCCAGTCCCACATCAAATGATGTCGTACATGAACGTGGGCACCTTGTCCAGAACCGAGCTACAG	ENSDARG00000059073	ENSDART00000082085.2:470	ZGA gene
has2	ENSDART00000053754.2	1632-1731	CACAAGCACCACTTGTGGATGACTTACGAGGCCGTCATCACCGGCTTCTTCCCGTTCTTCCTTATCGCCACTGCCATTCAACTGTTCTACCAGGGCAGGA	ENSDARG00000036987	ENSDART00000053754.2:1631	ZGA gene
her11	ENSDART00000126216.2	142-241	ATGACGAAGACAGAAGGGATCAAAAGAAGGCTAAAGCCTGTCATAGAGAAGAAAAGGAGAGATCGGATTAACCACAATCTAGACGCATTAAGAGATCTGC	ENSDARG00000002707	ENSDART00000126216.2:141	ZGA gene
her5	ENSDART00000145336.2	457-556	ATGTGAAAACATACACAAATCGCACTCAAGGCAAGTTCAGCTGCTGTCCACACCATCTCGCATAGAAACTCAGGTGCATCTCTATGAGGATCCATCACAG	ENSDARG00000008796	ENSDART00000145336.2:456	ZGA gene
hspb1	ENSDART00000149816.1	415-514	AAGATCAGCTCCTGTCTTTCTCCTGAAGGAGTCCTGACTGTTGAAGCTCCGCTTCCCAAACCTGCCATCCAGGCCCCAGAAGTTAACATCCCTGTCAACA	ENSDARG00000041065	ENSDART00000149816.1:414	ZGA gene
htafx	ENSDART00000040328.2	431-530	AAATCTGGAAAGAAGGGATCTTCCCAGTCACAAGAGTATTAAATGTTGAACTGAGCTAATTCATCCAAAGGCCCTTTTAAGGGCCACCCAACTCTTCTGA	ENSDARG00000029406	ENSDART00000040328.2:430	ZGA gene
id1	ENSDART00000059732.2	31-130	ACTCAACAAGCCTTTAAAAGGAGTACGAGCACCTCGCTTCAGCTATTCCTCTTTGACTTACTCGCAAATAGCCAAAATGAAAGTTGTGGGACCTACCTGC	ENSDARG00000040764	ENSDART00000059732.2:30	ZGA gene
ier5	ENSDART00000014330.2	589-688	CATGTTTGTTCTTCAAACAGGAAAAGAAGCGCAGAGGAGTCAGAAAGTGGCGATGCGCCTCAAAAAAGGACCAAAGTTGCTTCCTCAAACACGAAGGAAG	ENSDARG00000009881	ENSDART00000014330.2:588	ZGA gene
ier5l	ENSDART00000077189.2	815-914	TCCGAGATCGAGGAGGCACCGGATTTTACGCCGTGCAAAAGAGCGAAATTCGAGGACTCCTCATACGCGATCACGGAGCCCTTAGACACGTCGAACATTT	ENSDARG00000054906	ENSDART00000077189.2:814	ZGA gene
iratb	ENSDART00000080576.2	576-675	CCAGAGGAGCATTCTCCTGACCACTGTCATCGGGATGCTTTCCATGTTTTTTGTTGGAATAGCGCCGTCGACCGCACTTCCGACCTTCATCATTCCCTTC	ENSDARG00000057813	ENSDART00000080576.2:575	ZGA gene
irx7	ENSDART00000011627.2	712-811	GGGGACTCGAGCAGCAAAAGGAAAGTGACAAGTCTGACACTTTGACCAAAAGAGAGTCGTATAAACAAATCGCTGATGTCCAGAAACCTAAGATCTGGTC	ENSDARG00000002601	ENSDART00000011627.2:711	ZGA gene
isg15	ENSDART00000130554.2	222-321	CATCACAACTAATCCCGGAACTTTCCAGGTGTTCGTCAAGAACGAGAAGGGCCAGGTCAAAACTTATGATGTGGACGCCAACGAGACCGTCGATCAGCTC	ENSDARG00000086374	ENSDART00000130554.2:221	ZGA gene
klf17	ENSDART00000056655.2	884-983	ACGGACATTTTAATATGTTTAGCGAACCACTGCGGGCAAATCACCCGGCCATGCCAGGTGTGATGCTGACTCCACCATCCTCACCTCTCCTGGGATTTTT	ENSDARG00000038792	ENSDART00000056655.2:883	ZGA gene
klf2a	ENSDART00000062587.2	550-649	ACTCGGCATGGCAGGCGACTACAGAATGCAAGAGTCCAGAAACATGTACAACCCGACTACATACTCGGTGCCTGAGATCAACCCATCACCACCTCCACCG	ENSDARG00000042667	ENSDART00000062587.2:549	ZGA gene
klf2b	ENSDART00000149045.1	970-1069	AATGGGGATGCAACCCAGCATGCAGCGGGCTCTTCTCACTCCTCCGTCCTCTCCGTTAGAGCTAATGGAGTCTAAACCCAAGCGAGGGCGACGCACCTGG	ENSDARG00000040432	ENSDART00000149045.1:969	ZGA gene
krt18	ENSDART00000137866.2	256-355	CGCCACCTACAGGAGGCTACTGGATGGTGGAGACTTCAAACTCCAGGATGCTCTTGAAGAGCAGAAGAAGGTCAAAGTGATGACGGTCACGCAGACGCTG	ENSDARG00000018404	ENSDART00000137866.2:255	ZGA gene
krt4	ENSDART00000012644.2	1613-1712	CAGCCGACACAGTTTCCAACCTTCCTTACCTGCAACTAGATCCCTTCTGAACCTTCTTACGACTCAAACCATCTATGGTGCTATATTTTAGCCAGACAGC	ENSDARG00000017624	ENSDART00000012644.2:1612	ZGA gene
krt5	ENSDART00000129044.2	809-908	GAACTTGGTGGAGGACTTCAAGAACAAATATGAAGATGAAATCAACAAGCGTGCCGCAGTGGAAAATGAATTTGTCCTGCTGAAGAAGGATGTCGATGCT	ENSDARG00000058371	ENSDART00000129044.2:808	ZGA gene
lfng	ENSDART00000028673.2	809-908	AGAAAGACTTGGGGACAACAAAATGAGACCTGTGAATTTCTGGTTTGCCACTGGAGGAGCTGGTTTCTGTATCAGCCGTGGGCTTGCTTTGAAGATGAGT	ENSDARG00000037879	ENSDART00000028673.2:808	ZGA gene
lrwd1	ENSDART00000050906.2	390-489	GGAAGGATATCAGTTCAACAGCTCATCATATTCGCCATGGGAGCACTGAGATCCTCAGGAAGCGGGTGATTGGTGTGTGGGAACGAGACTTTAGTCTTCC	ENSDARG00000035147	ENSDART00000050906.2:389	ZGA gene
marcksl1a	ENSDART00000056987.2	1040-1139	GGTTTCGTCCGGTCTGGTGTCAGTGTGGTGCCAAACGTGGAGAGCTTTTTTTTTGTTGTTGGGAATCGGGCCGGAAGTGCTCTGTGTTTGGATTGGAACG	ENSDARG00000039034	ENSDART00000056987.2:1039	ZGA gene
mcm3	ENSDART00000121535.2	1698-1797	AAAAAACAAGGATCGAGTAGTGAGCAAAGCCTTCATGAGGAAGTACATCCACGTCGCCAAAGCCATTTCTCCAGTTTTGACCCAAGATGCAGCCAATCAC	ENSDARG00000090802	ENSDART00000121535.2:1697	ZGA gene
mex3b	ENSDART00000101537.2	1247-1346	CGCCAACGCCAATGGATTTGTCTACAGCGGCGAGGTGATCTCGCCAGATTGCACTGACTTGACCTTCGAGTCGTCGCCAGGATTTGATCCTACTCCTGCG	ENSDARG00000058369	ENSDART00000101537.2:1246	ZGA gene
mid1ip1a	ENSDART00000060150.2	497-596	GAAGTGCACCATGAAGGATCCACATCTACTGCGATATGATGAACTGTTGTGTTGTTCTAAGACGATCTGCTCTGCATTTGTGGAAGAGCCAAAGGGGACT	ENSDARG00000041051	ENSDART00000060150.2:496	ZGA gene
morc3b	ENSDART00000074450.2	432-531	TTGGCGTGTACGGAAATGGATTCAAATCGGGGTCCATGCGCTTGGGAAAAGATGCCATTGTTTTCACCAAGACTAAAGACACCATGAGTGTGGGGCTCCT	ENSDARG00000043271	ENSDART00000074450.2:431	ZGA gene
MPLKIP	ENSDART00000112014.2	467-566	CCCGGAAGACACTCTGGATATCAGGGTTCACCGCGGACATCCACACCATTTGGTTCAGCGCATGGCAGGGATAGAGGGACAAATGATATGGAAAAGTATT	ENSDARG00000078986	ENSDART00000112014.2:466	ZGA gene
mxtx2	ENSDART00000006505.2	717-816	GTTGGATGCCCTAGTAGCATGGAGTCACTTTCAACATCTCCTGCGTCTTCTGATTCTGCATTTTGGGACATGGGATTGGAGAACTGCTCTCCATCTGTGC	ENSDARG00000015906	ENSDART00000006505.2:716	ZGA gene
mych	ENSDART00000115049.2	1197-1296	GCCAGACTTGAACAGCTGAAGAGACATTGAGCACCCGGGACTAAACTTTAGCCACTTGATAGTAGTCGAGTGCTCGGCTGGTTTGAGGACTGAAACACAT	ENSDARG00000077473	ENSDART00000115049.2:1196	ZGA gene
neurlb	ENSDART00000088490.2	1314-1413	AAACAAATCAGCATACTGGGCACTTCCCGTGGTTACTCTCCCTCCTGTTCAGAAACACAGAGGTCCATCTTTAGTGATGCCAGTCACCTCTCTGCCAATC	ENSDARG00000061773	ENSDART00000088490.2:1313	ZGA gene
nnr	ENSDART00000081875.2	401-500	GATATCAGGATGTTTATGGGAAGACACTCCCAGATCTCAACAGCCGTAACAGACACCTGGCATGTTTAAATTTCATCTTCTTGTGCTGGAGCGATGTGGG	ENSDARG00000058917	ENSDART00000081875.2:400	ZGA gene
polr3gla	ENSDART00000132660.2	713-812	ACTACATTGCGTCTTACTTTGACAACGGAGAGGATTTTGGAGGGGATAGTGATGACAACATGGACGAAGCGGTCTACTAATACATTTCAAGAGGCCTTTT	ENSDARG00000012044	ENSDART00000132660.2:712	ZGA gene
shisha2	ENSDART00000045574.2	399-498	AGTGCGTTCCTGTCGTTTGTGCTGGTCGGTGCGATTGTATCTGTCTGCTGCTGCCAGTGTGTGAAGCCCAAAGCAAGCGATCATCCAGTGGGACCCTCCG	ENSDARG00000034138	ENSDART00000045574.2:398	ZGA gene
slc25a22	ENSDART00000143900.2	242-341	GTGTTTCCCATCGATTTAGCCAAGACCAGACTCCAGAACCAAAGACAAGGCCAGCAAGTCTACAAGAGCATGATTGACTGCCTCATCAAAACAGTACGAA	ENSDARG00000020893	ENSDART00000143900.2:241	ZGA gene
slc3a2b	ENSDART00000053797.2	1043-1142	AAGTTGCCCAAGCTGTTGAAAGCCTGTATTCCACTTACAATCAGACCCGACTGGCTTGGAACATCGGTGGACGAATTGCAGGACATCTGGCTTCAGTTGT	ENSDARG00000037012	ENSDART00000053797.2:1042	ZGA gene
snai2	ENSDART00000058571.2	996-1095	AAAAGACGATTTCAAAATGCACCTCCCCAGGGTCTGAATGAATCAAATGTTTGTGTTGAGTCAGATTCCAACCAAGATGCTACACGTTGAAGGGATAGTT	ENSDARG00000040046	ENSDART00000058571.2:995	ZGA gene
sox11a	ENSDART00000110040.2	1161-1260	ACTAAATAAGACTATTCCCAAGTAATAACACACACGGGAGAGAGGTATAATGCTCTGTTCTGTACGTATTTCTTTCCCCTGCCTTCCACTGCTGGTCCAC	ENSDARG00000077811	ENSDART00000110040.2:1160	ZGA gene
sox19a	ENSDART00000114113.2	373-472	CTGTCAACAGCCAACAACAGCAGAGTAGCGATCCTATGGACAAAGTTAAGAGGCCCATGAACGCATTTATGGTGTGGTCTCGGGGTCAGAGGCGCAAAAT	ENSDARG00000010770	ENSDART00000114113.2:372	ZGA gene
sox3	ENSDART00000075617.2	973-1072	CCCGGTGGAGACAGCGCCGACCACTCCAGTCTACAGACCAGTCGGTTACACAGCGTTCATCCGCACTATCAAAGCGCAGGGACAGGCGTGAACGGAACGC	ENSDARG00000053569	ENSDART00000075617.2:972	ZGA gene
stm	ENSDART00000105174.2	686-785	AACCGTCAGCCGAGGACCACACAGACGGCAATCACGCTGGAAAAGATTCAACTGATTCAAAGGAATCACCAGACACCACTGACAAGCCAGAAGGACCAGA	ENSDARG00000035694	ENSDART00000105174.2:685	ZGA gene
sult6b1	ENSDART00000130131.2	517-616	CTGGGACAAGTTCTTCTCTGACTTCATGACTGGTGATGTTAGTTGGGGCTCTTACTTTGATCACGCTCTCGCCTGGGAGAAACGGATAGACGACCCGAAC	ENSDARG00000086826	ENSDART00000130131.2:516	ZGA gene
tbx16	ENSDART00000007090.2	1058-1157	CCCACTGGGATCAGACCATCGAGACGTGTACAGCTCCGAGCAGCTCGTTCCAGGACAGAACACATACCAGCCGTACAGATTTCACGAATACGGCAAATCC	ENSDARG00000007329	ENSDART00000007090.2:1057	ZGA gene
tp53inp2	ENSDART00000125731.2	405-504	TCTTCCACAACACTTCTCTCGCAAACACCGCATGGTCCTTCACCAGCCTGGCCGATGCAACTTTAATCATTAAGATGCAACGAGTACGCAAACGAACAAC	ENSDARG00000088178	ENSDART00000125731.2:404	ZGA gene
tsc22d3	ENSDART00000054115.2	728-827	TACGACCAGTACCAGTGGCCTAGTTCTGTAAAATCCGACAATCTCTTGGGACTAACATGGAAAAGAGAGAGTGATGTAGACGTCCGAGGTTACTGTACAA	ENSDARG00000075666	ENSDART00000054115.2:727	ZGA gene
vent	ENSDART00000017456.2	740-839	ACACATGCAACAAGCCATTTTGGATGGTCAAAACAGGATCTTATGTGTGCAAGTTGTTCACACACACACAACCGGCGATTTTGCATGCTCAAAACATGAT	ENSDARG00000017164	ENSDART00000017456.2:739	ZGA gene
vgll4l	ENSDART00000098925.2	583-682	TTGCGTCTCTTCTGCATCAAGGTCAACAAAGCAGGACTGCTGCAATCACTCAACTGCTGTAAGCAAACACAGTTATGACCACGTCGAAGAGCATTTCCAG	ENSDARG00000068409	ENSDART00000098925.2:582	ZGA gene
vox	ENSDART00000167949.1	569-668	ACTTGGTTCCAGAACCGAAGGATGAAGCTGAAGCGGGAAGTGCAGGAAATGCGCGCGGATTTTCTGCTGCCTCAGATGGTACTTCCGCCGGTCATTCCCG	ENSDARG00000099761	ENSDART00000167949.1:568	ZGA gene
wnt11	ENSDART00000013590.2	1416-1515	TACTGTGGTAAAACTTCACGCGTTGATGGCCTGCCCGGATCGGTTTTGTTTTGGTCAGATGAATTTCACGAGCTGGACGTGATGGACATCAGATTAGTTC	ENSDARG00000004256	ENSDART00000013590.2:1415	ZGA gene
yaf2	ENSDART00000080334.2	114-213	GCGAAGCCCTCCTCTGACGACGGCTATTGGGACTGCAGCGTGTGTACATTCAAGAACACCGCCGAAGCGTTCAAATGCATGATGTGCGATGTCAGGAAGG	ENSDARG00000015966	ENSDART00000080334.2:113	ZGA gene
yy1a	ENSDART00000062811.2	1302-1401	CACACATTTTGATGGGAATTGAAATGTGAACGAGGAACTGACACCAAACTTACCCCGTCAAGCATCTCGTGGTATAGACCTGAATTAAATAACTTCCCGG	ENSDARG00000042796	ENSDART00000062811.2:1301	ZGA gene
zic2b	ENSDART00000054066.2	1501-1600	GCCGCGCTCAACAGCAGCGGGCACAATAGCTTAACGTCCAATTTTAACGAGTGGTACGTTTAAGGACTCCGCCAAGAACTGCATATCCTAAAATAAAATA	ENSDARG00000037178	ENSDART00000054066.2:1500	ZGA gene
znf1113	ENSDART00000150313.1	1322-1421	GCGCCATACAACAGAATTTTGCATGCTCAAACTCTTGTGTGACCGCAGCTTCGGTGTGAGAAGAGTTTCAGTTACTCATCAGAAGATACTAGAAAAATAC	ENSDARG00000096172	ENSDART00000150313.1:1321	ZGA gene
