# Supplementary material for: Competition between histone and transcription factor binding regulates the onset of transcription in zebrafish embryos
Source: eLife. 2017 Apr 20;6:e23326. doi: 10.7554/eLife.23326 (PMC5451213; doi:10.7554/eLife.23326)
Supplement: Figure 4—source data 1. — See Materials and methods for details on calculations. DOI: http://dx.doi.org/10.7554/eLife.23326.013 [file elife-23326-fig4-data1.xlsx]

## Sheet: Sheet1
Figure 4—source data 1
Quantification of histone number by mass spectrometry
See Materials and Methods for details on calculations
ZV10	Diploid	Nucleosome repeat length	Number of nucleosomes per genome	Number of histones per genome
ZF genome bp
1,464,443,456	2,928,886,912	187	15,662,497	31,324,994
Developmental stage	Number of histones (MS)				Genomes worth of histones (using H2B levels)
	H3	H4	H2A	H2B
1-cell	1.45541e+11	2.51709e+11	1.27544e+11	9.71052e+10	3099.93
8-cell	2.10123e+11	2.26428e+11	1.5409e+11	1.30134e+11	4154.31
64-cell	2.5705e+11	2.79328e+11	1.95743e+11	1.67481e+11	5346.57
256-cell	3.79166e+11	3.45319e+11	2.64277e+11	2.34229e+11	7477.38
1K	5.58281e+11	4.4761e+11	3.63655e+11	3.38214e+11	10796.9
high	5.58765e+11	4.62853e+11	3.73629e+11	3.54292e+11	11310.2
oblong	6.17021e+11	5.14486e+11	4.31972e+11	4.20873e+11	13435.7
sphere	7.00739e+11	5.62105e+11	4.79085e+11	4.48329e+11	14312.2
dome	1.14981e+12	8.90349e+11	7.76771e+11	7.3355e+11	23417.4
shield	2.01057e+12	1.37378e+12	1.15772e+12	1.25128e+12	39945.1
