# Supplementary figures and images for: Competition between histone and transcription factor binding regulates the onset of transcription in zebrafish embryos
Source: eLife journal article supplement (doi:10.7554/elife.23326), 2017-04-20

Figure 3-figure supplement 1

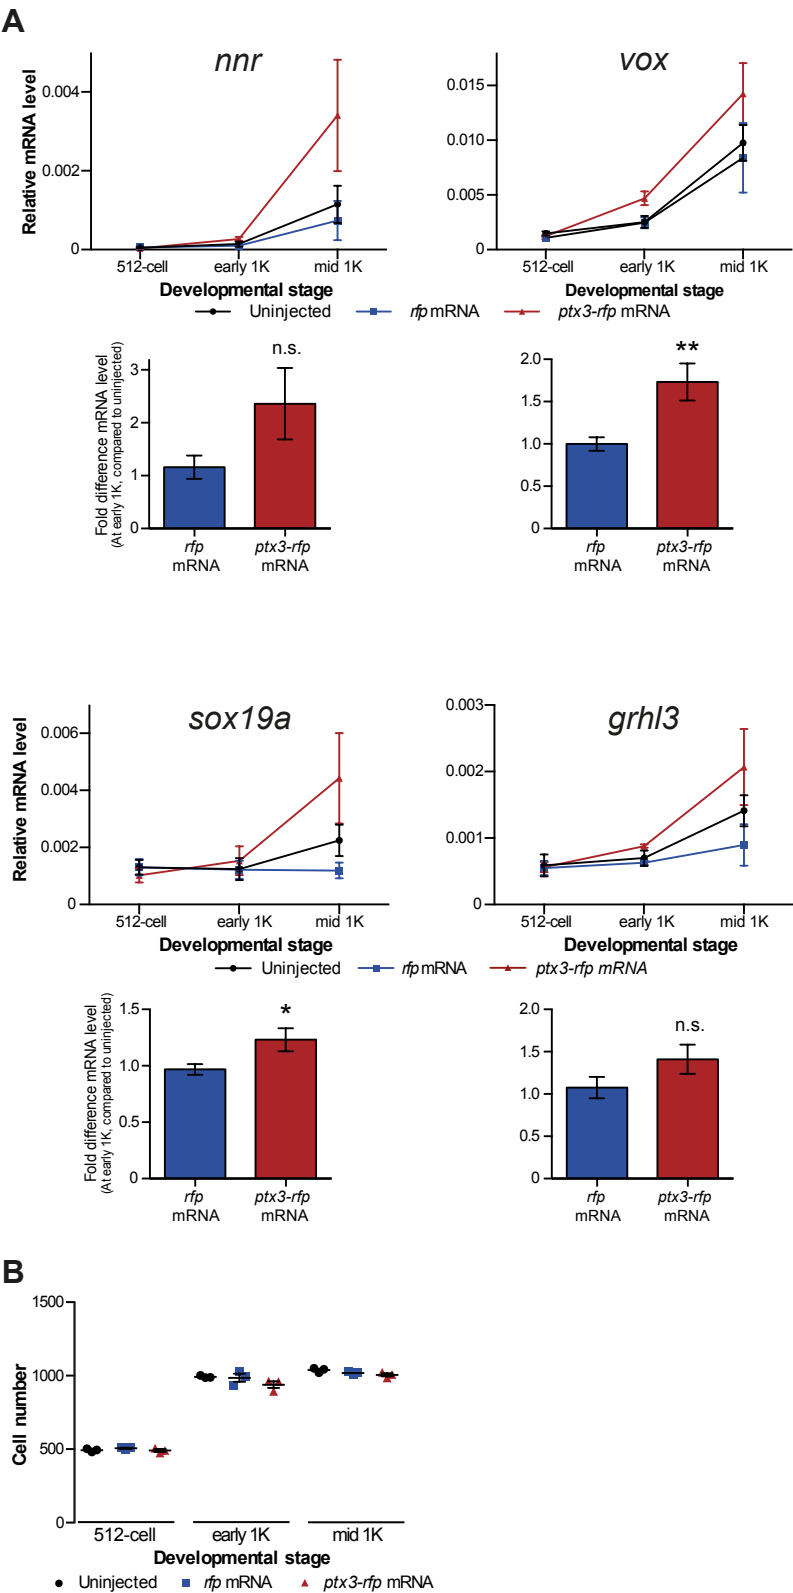

Supplement: supp [file elife-23326-supp-v1.zip]

**A**

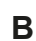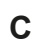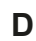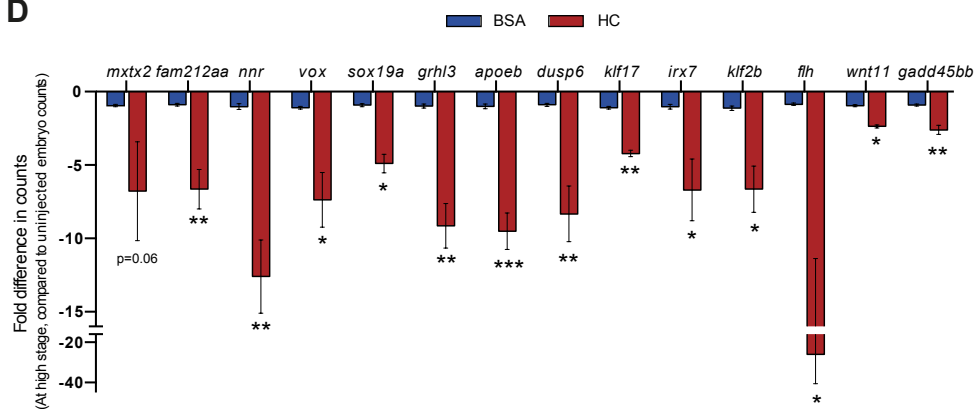

Supplement: supp [file elife-23326-supp-v1.zip]

Figure 2-figure supplement 1

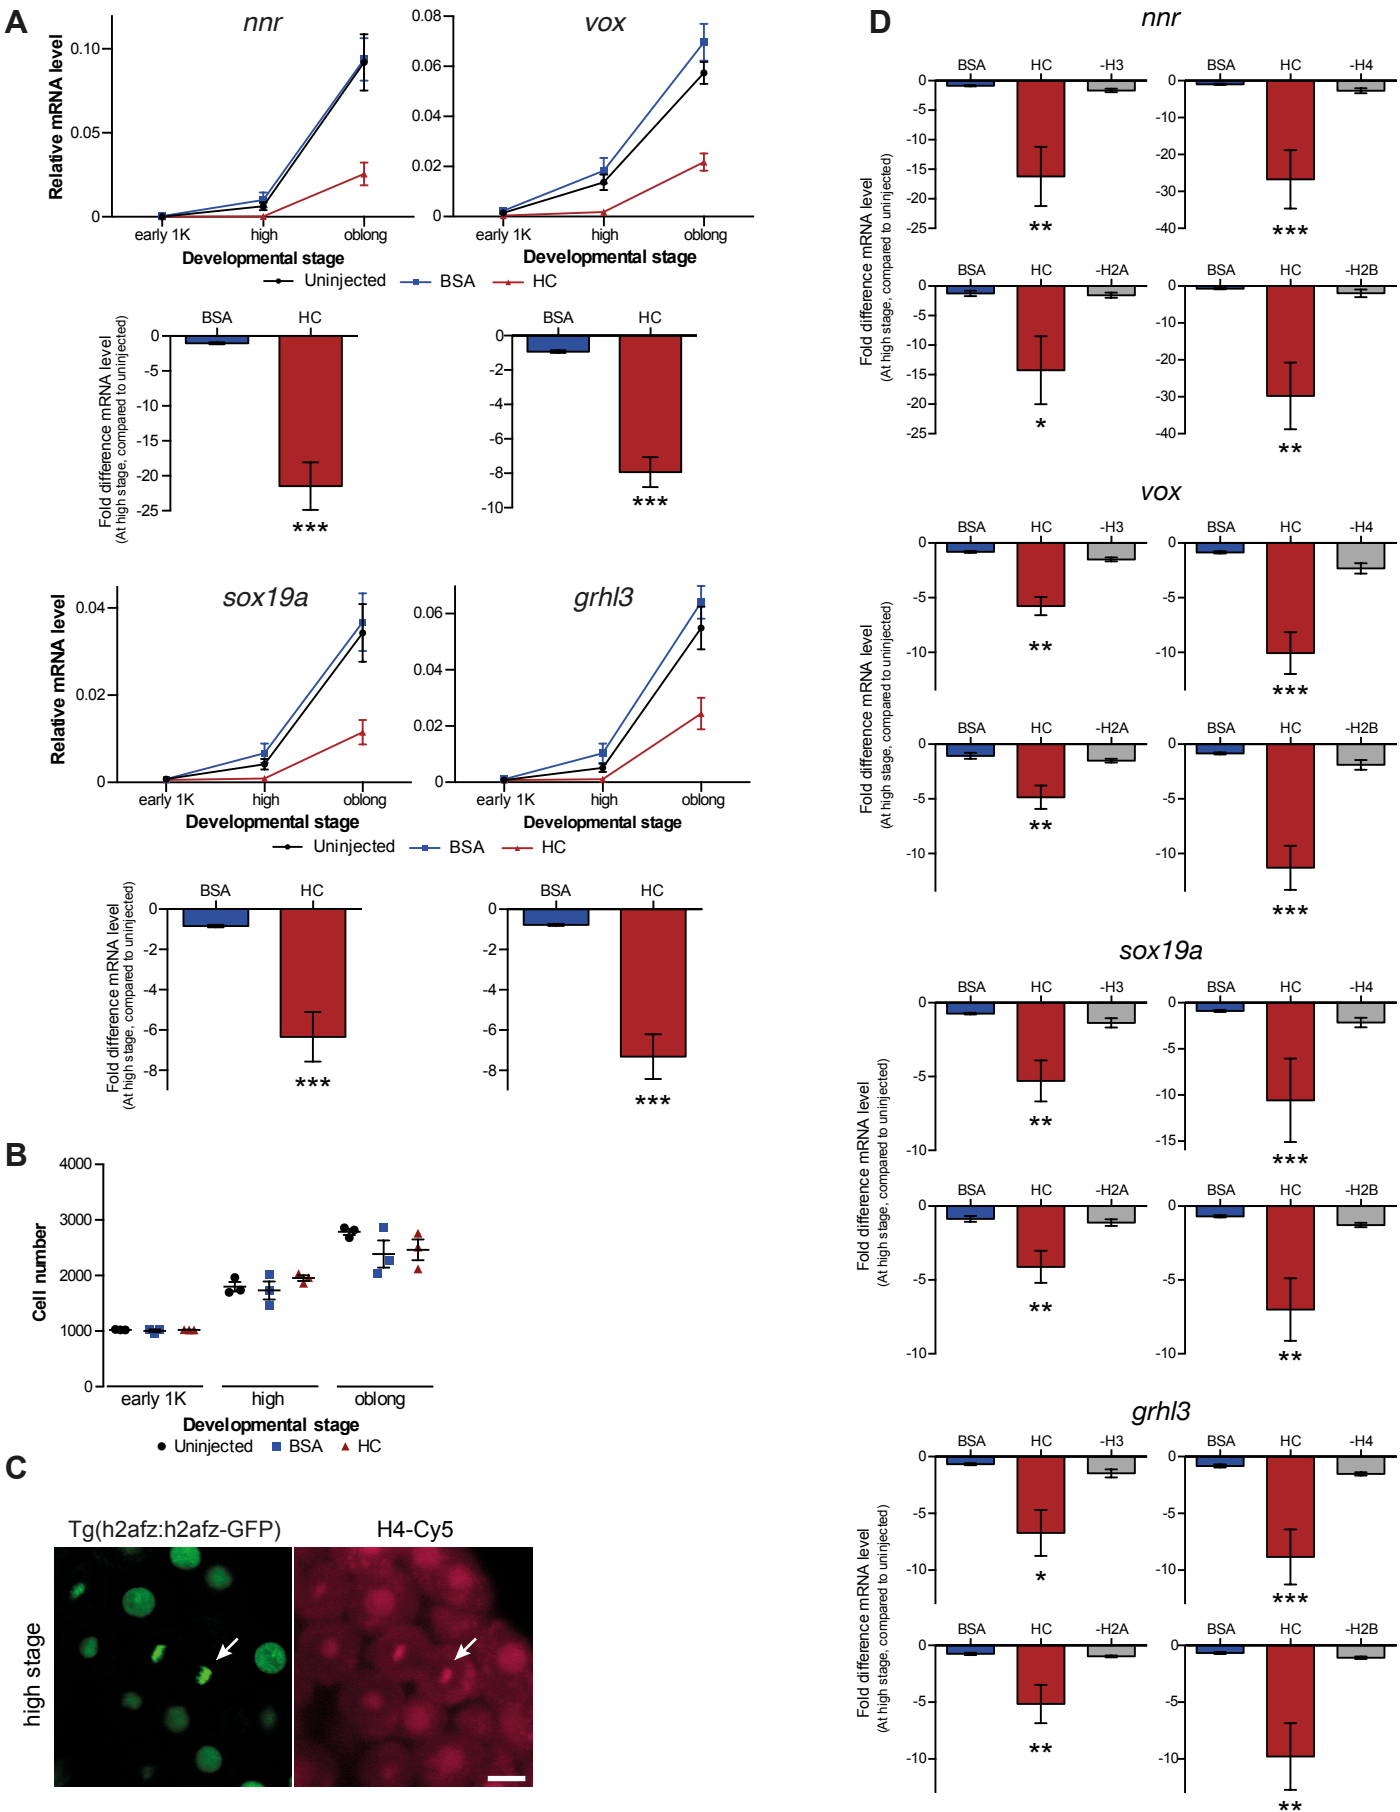

Supplement: supp [file elife-23326-supp-v1.zip]

Figure 1-figure supplement 1

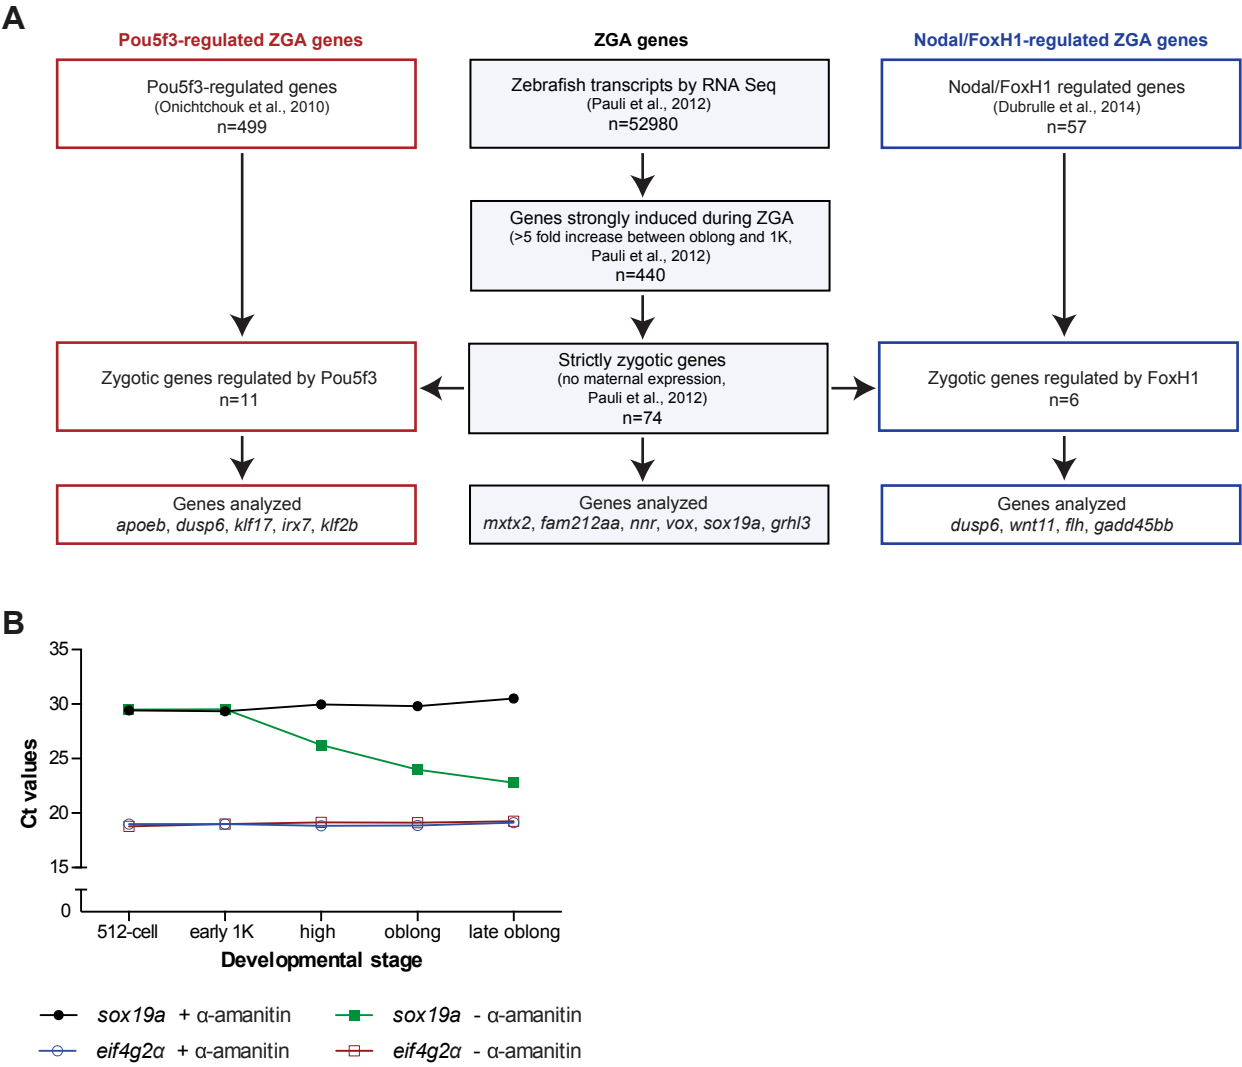

Supplement: supp [file elife-23326-supp-v1.zip]

Figure 4-figure supplement 1

A

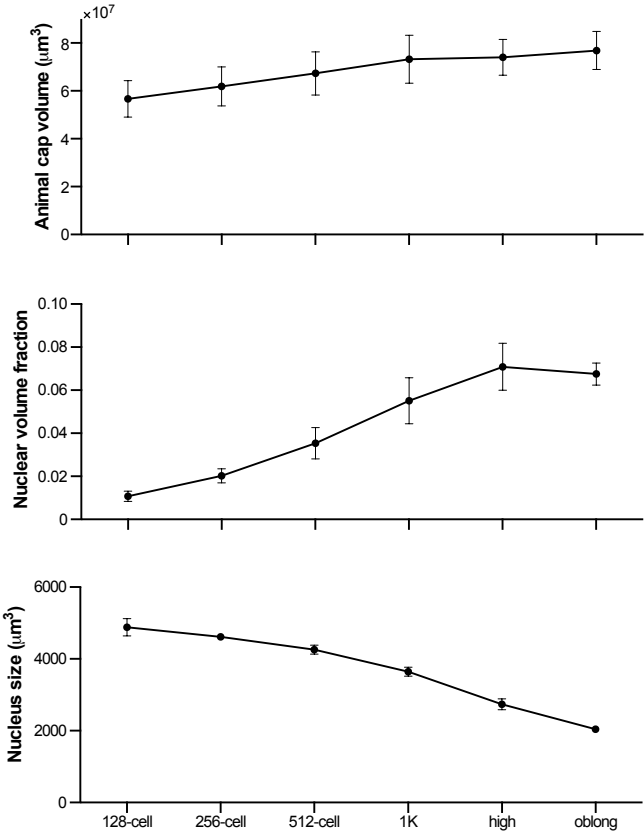

C

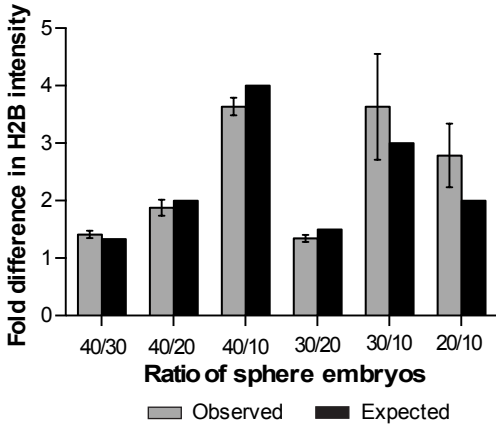

B

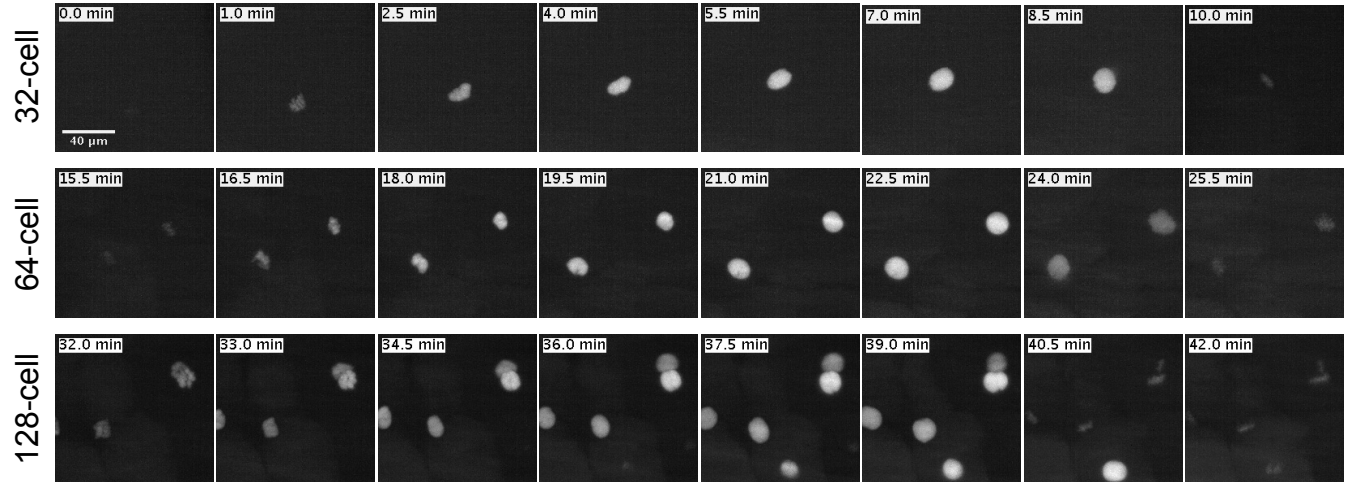

Supplement: supp [file elife-23326-supp-v1.zip]

Figure 5-figure supplement 2

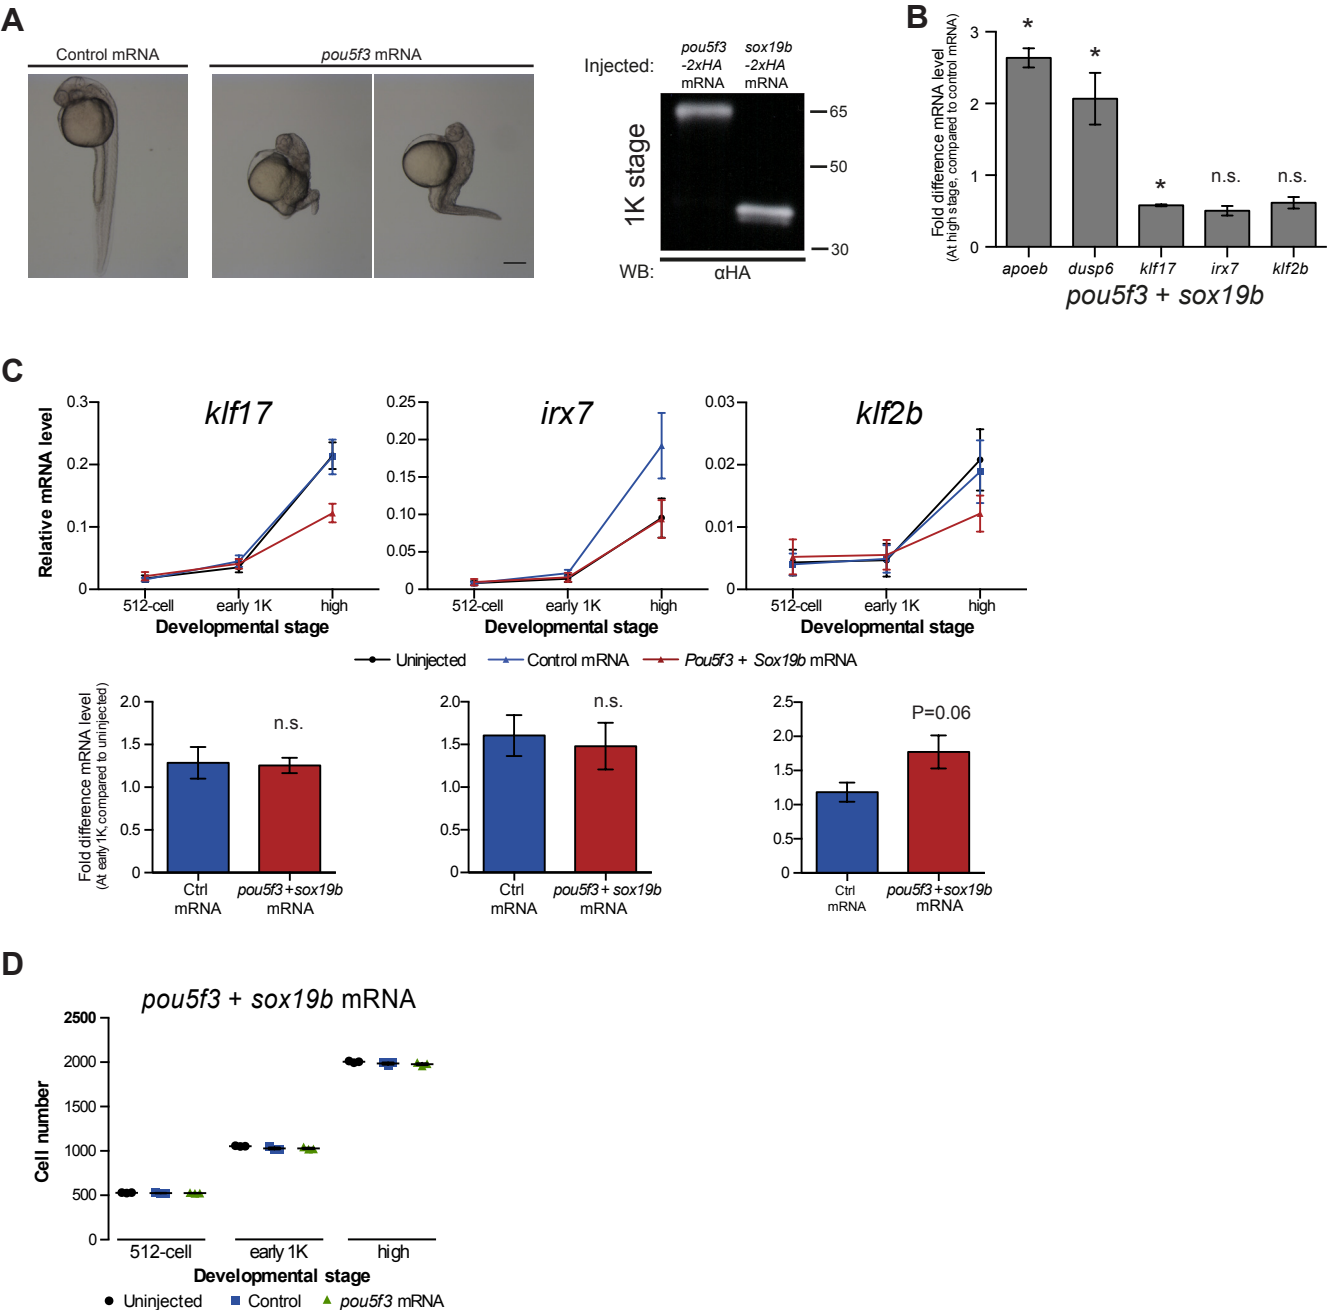

Supplement: supp [file elife-23326-supp-v1.zip]

# Figure 6-figure supplement 1

**A**

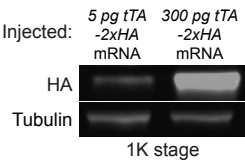

**B**

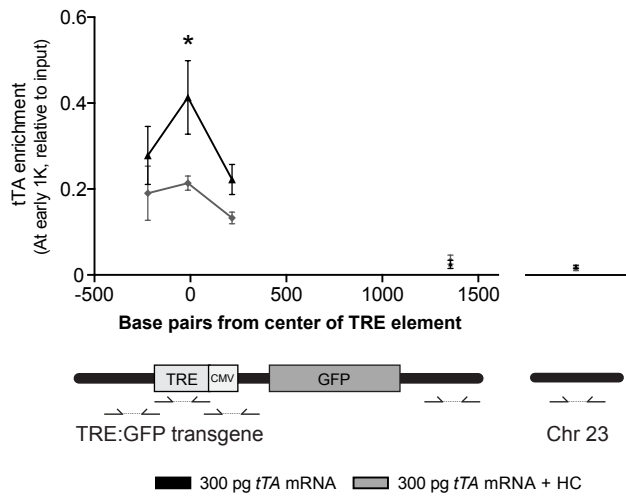

Supplement: supp [file elife-23326-supp-v1.zip]

Figure 5-figure supplement 1

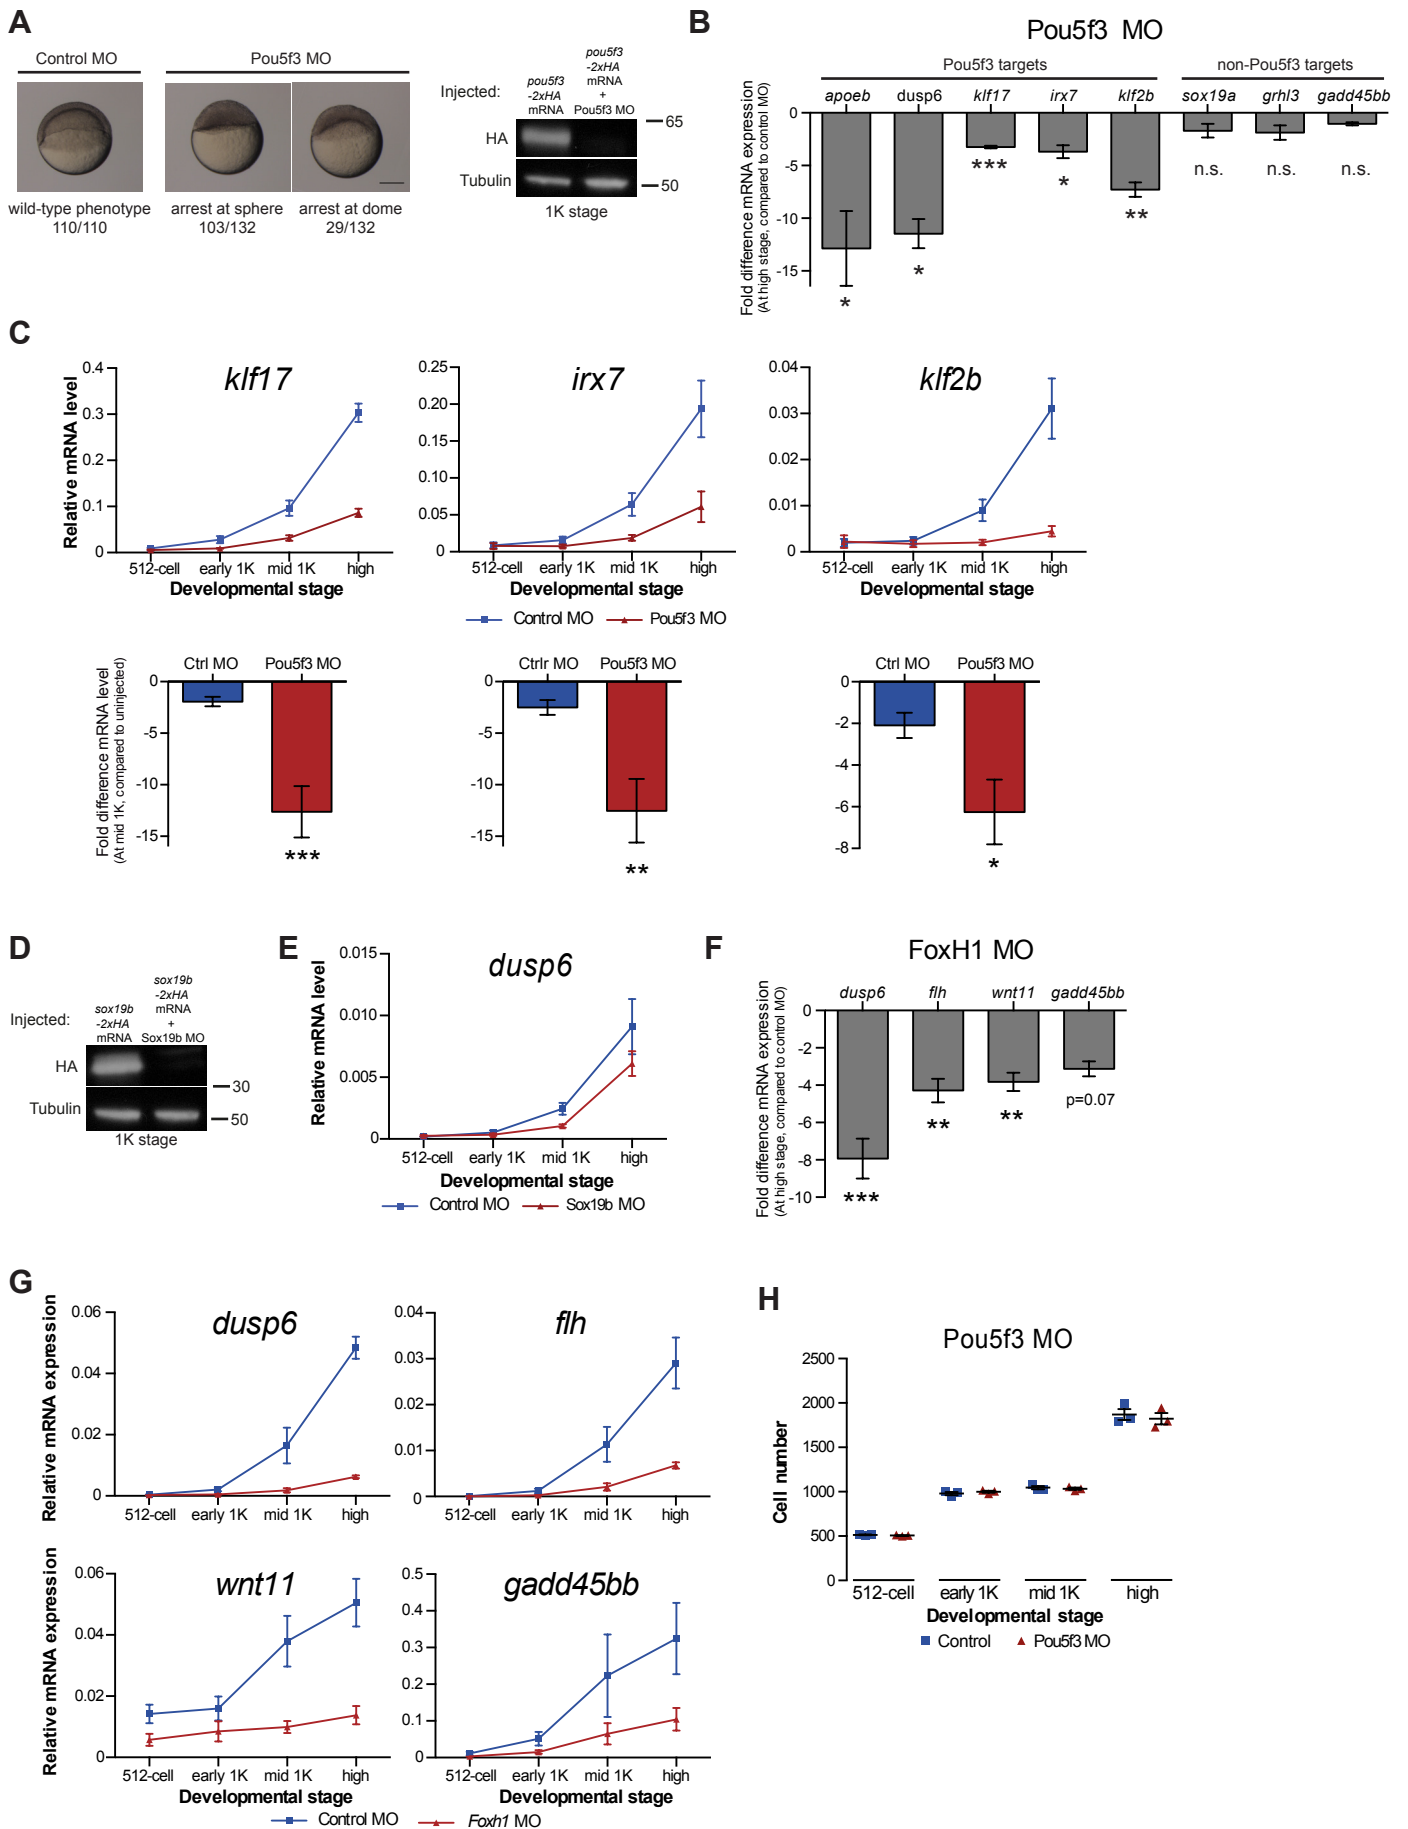

Supplement: supp [file elife-23326-supp-v1.zip]
